# Supplementary material
Source: publisher figshare collection journal article supplement (https://acs.figshare.com/ndownloader/files/3953512)
Supplement: Supplementary file 1 [file 3953512]

# **Efficient and facile synthesis of gold nanorods with finely tunable plasmonic peaks from visible to near-IR range**

**Liming Zhang<sup>a,b,¶</sup>, Kai Xia<sup>a,¶</sup>, Zhuoxuan Lu<sup>a,b,¶</sup>, Guopeng Li<sup>b</sup>, Juan Chen<sup>b</sup>, Yan Deng<sup>a</sup>,  
Song Li<sup>a</sup>, Feimeng Zhou<sup>c</sup>, Nongyue He<sup>a,b,\*</sup>**

## **EXPERIMENTAL SECTION**

### **Seed-mediated GNRs synthesis by using 1,2,4- trihydroxybenzene as a reductant**

The seeds solution for GNRs growth was prepared as follows: 0.125 mL of HAuCl<sub>4</sub> solution (0.01 M) was added to 5 mL of CTAB (0.10 M), the solution was mixed by inversion. Then 0.3 mL of fresh NaBH<sub>4</sub> solution (0.01 M) was injected into the Au(III)-CTAB solution under vigorous stirring for 2 min. The solution color changed from yellow to pale brown-yellow color. The seeds solution was aged at room temperature for 1 h before use. To prepare the growth solution, 40  $\mu$ L of silver nitrate (0.02 M) and 0.3 mL of HAuCl<sub>4</sub> (0.01 M) solutions were added into 7.125 mL of CTAB solution (0.1M). Then 40  $\mu$ L of 1,2,4-trihydroxybenzene (0.1 M) aqueous solution was added, and the solution was mixed by hand-stirred until the color changed from yellow to reddish purple. Finally, a certain amount of seeds solution was injected into the growth solution. The resultant mixture was mixed by hand-stirred and left undisturbed at 30 °C for 12 h for GNRs growth.

### **Length and width statistical analysis**

All samples were analysed over 100 particles. And corresponding length and width distributions were shown in Figure S8. Aspect ratios were calculated using the size of length dividing width, and the LSPR was plotted as a function of aspect ratio.

## **RESULTS AND DISCUSSION**

### **Forming dogbone-like GNRs using trihydroxybenzene as reducer**

In the case of using reducers of trihydroxybenzene, GNRs have dogbone shape. Similar dogbone-like GNRs were also reported when using ascorbic acid as the reducing agent. several literatures<sup>1,2</sup> proposed the mechanism. One explanation is that with the overgrowth of GNRs, the {111} phase at the end of the rods break out of the CTAB shell to enlarge into the dogbone shape.<sup>2</sup> Another explanation is that the growth of GNRs involves preferential deposition of silver-containing species.

Therefore, once all available silver is used up, further growth of the rods will be unconstrained by the passivated sheath, causing a transition from the cylindrical rod to the dogbone morphology.<sup>1</sup> When we attempted to prepare GNRs by adding seeds to the growth solution, we found that GNRs with the dogbone morphology can be easily obtained with a small number of seeds. However, silver concentration seems to have little effect on the formation of the dogbone morphology. Therefore, we attributed the dogbone morphology to the overgrowth of GNRs (Figure S11) with the {111} phase at the end of the rods breaks out of the CTAB.

#### **References:**

1. Xu, X.; Cortie, M. B., Shape Change and Color Gamut in Gold Nanorods, Dumbbells, and Dog Bones. *Advanced Functional Materials* **2006**, 16, (16), 2170-2176.
2. Gou, L.; Murphy, C. J., Fine-Tuning the Shape of Gold Nanorods. *Chemistry of Materials* **2005**, 17, (14), 3668-3672.

## Figures

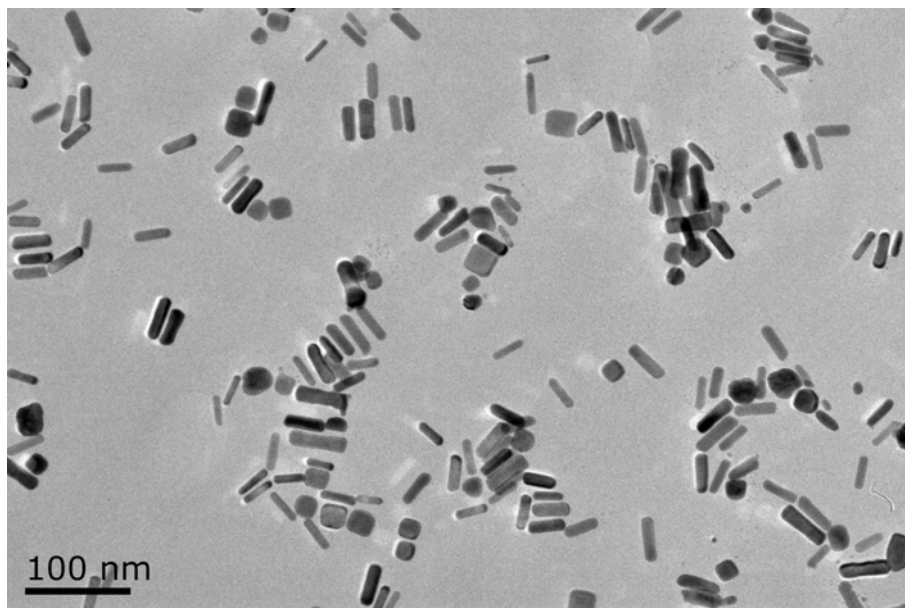

Figure S1. TEM image of ascorbic acid-reduced GNRs via the one-pot method. GNRs preparation condition: [CTAB] = 0.1 M, [HAuCl<sub>4</sub>] = 0.40 mM, [AgNO<sub>3</sub>] = 0.11 mM, [ascorbic acid] = 0.6 mM, and [NaBH<sub>4</sub>] = 0.00066 mM in a total volume of 7.6 mL.

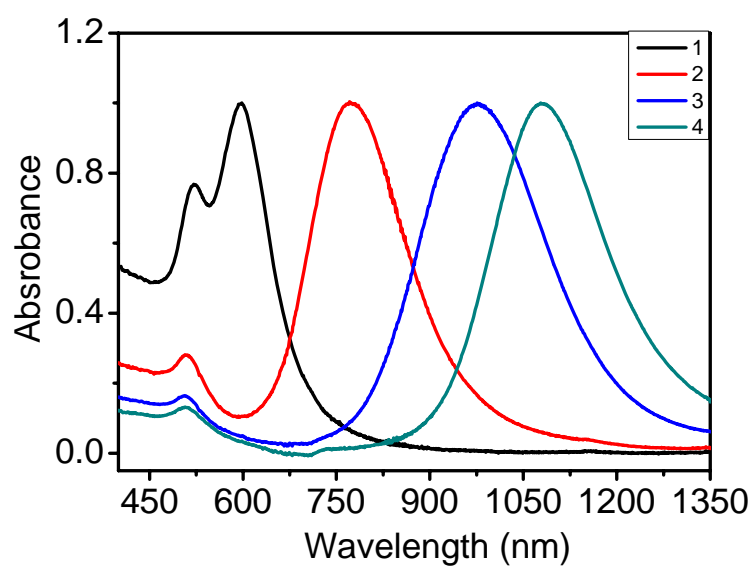

Figure S2. VIS-NIR spectra of hydroquinone-reduced GNRs at different  $\text{AgNO}_3$  concentrations: (1) 0.08, (2) 0.16, (3) 0.21, and (4) 0.37 mM. GNR preparation conditions:  $[\text{CTAB}] = 0.1$  M,  $[\text{HAuCl}_4] = 0.40$  mM,  $[\text{hydroquinone}] = 5.26$  mM, and  $[\text{NaBH}_4] = 0.0017$  mM in a total volume of 7.6 mL.

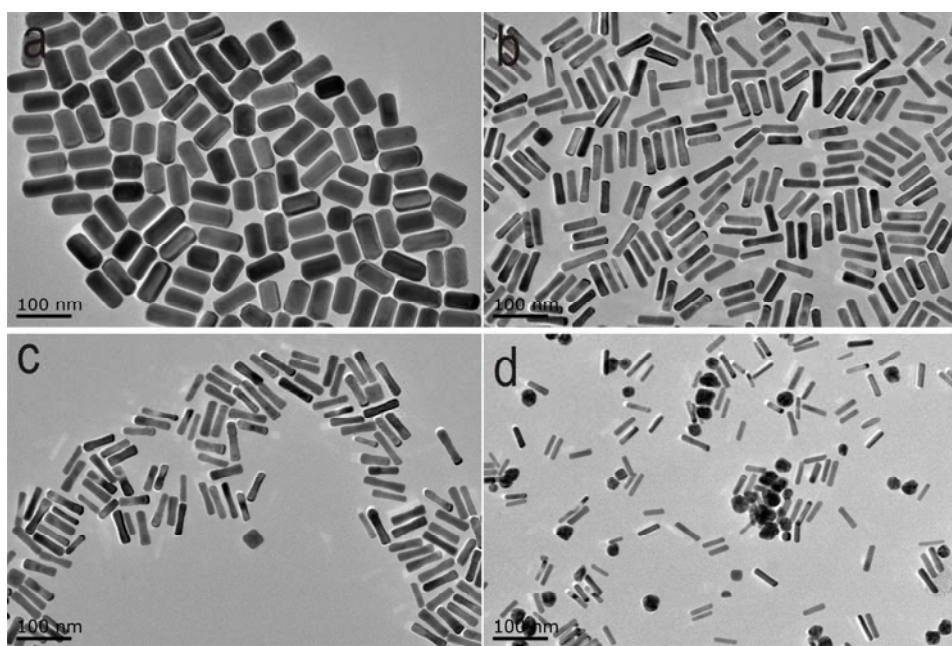

Figure S3. TEM images of 1,2,3-trihydroxybenzene-reduced GNRs at different  $\text{AgNO}_3$  concentration. GNR preparation conditions:  $[\text{CTAB}] = 0.1 \text{ M}$ ,  $[\text{HAuCl}_4] = 0.40 \text{ mM}$ ,  $[\text{1,2,3-trihydroxybenzene}] = 0.36 \text{ mM}$ , and  $[\text{NaBH}_4] = 0.0039 \text{ mM}$  in a total volume of 7.6 mL. The  $\text{AgNO}_3$  concentrations are (a) 0.052, (b) 0.11, (c) 0.16, and (d) 0.33 mM.

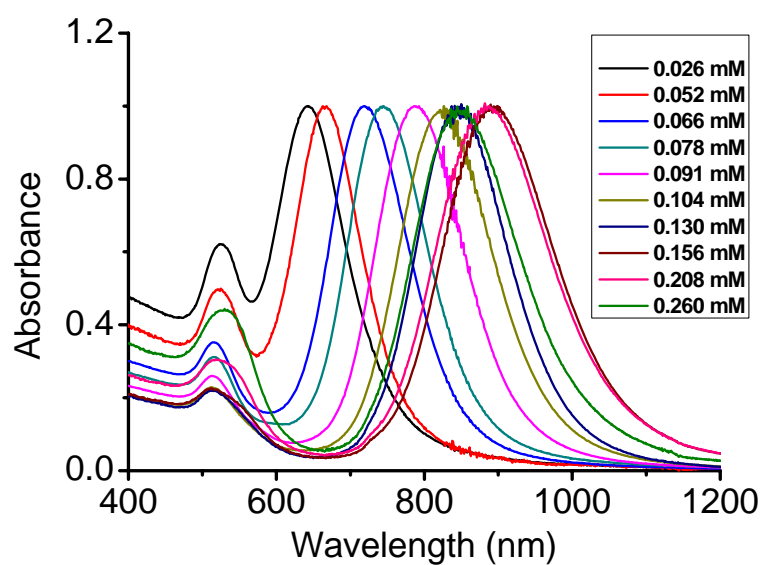

Figure S4. VIS-NIR spectra of 1,2,3-trihydroxybenzene-reduced GNRs at different  $\text{AgNO}_3$  concentration. GNRs preparation conditions:  $[\text{CTAB}] = 0.1 \text{ M}$ ,  $[\text{HAuCl}_4] = 0.40 \text{ mM}$ ,  $[\text{1,2,3-trihydroxybenzene}] = 0.36 \text{ mM}$ , and  $[\text{NaBH}_4] = 0.0039 \text{ mM}$  in a total volume of 7.6 mL.

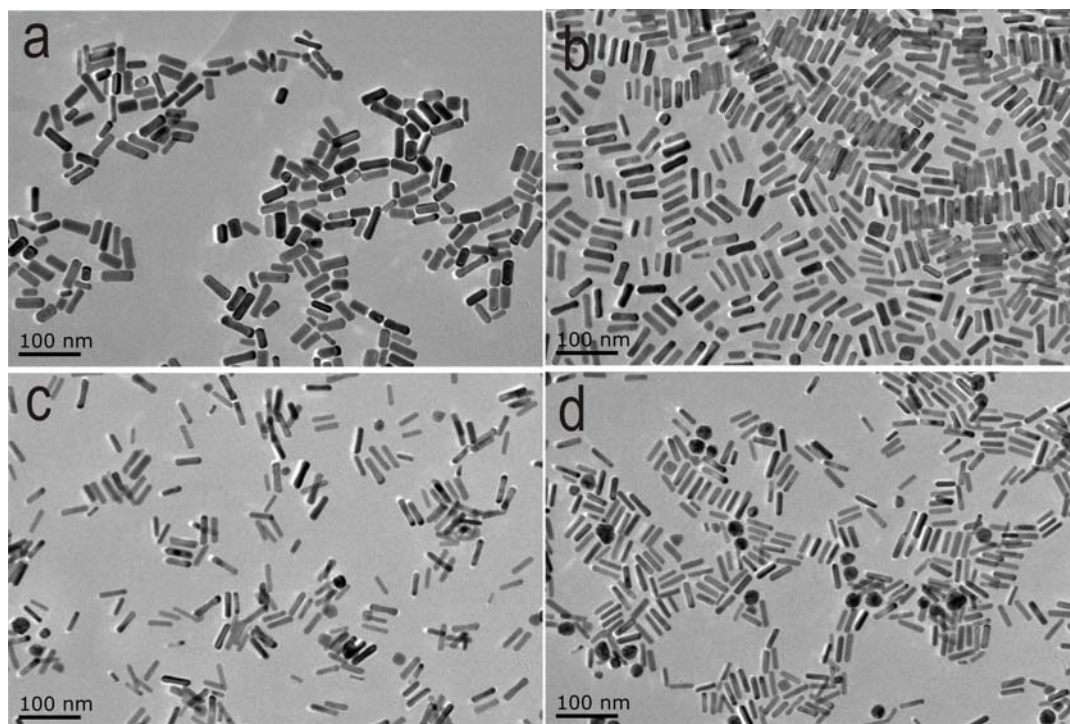

Figure S5. TEM images of 1,2,4-trihydroxybenzene-reduced GNRs at different  $\text{AgNO}_3$  concentration. GNRs preparation conditions:  $[\text{CTAB}] = 0.1 \text{ M}$ ,  $[\text{HAuCl}_4] = 0.40 \text{ mM}$ ,  $[1,2,4\text{-trihydroxybenzene}] = 0.8 \text{ mM}$ , and  $[\text{NaBH}_4] = 0.00067 \text{ mM}$  in a total volume of 7.6 mL. The  $\text{AgNO}_3$  concentrations are (a) 0.027, (b) 0.055, (c) 0.11, and (d) 0.135 mM.



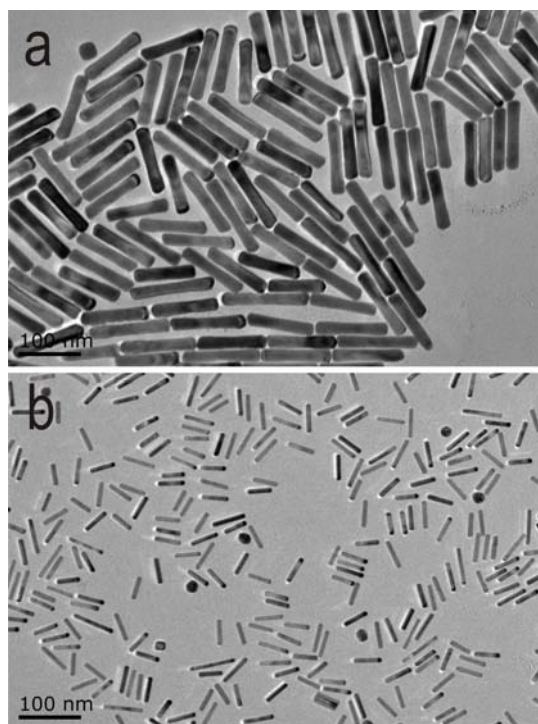

Figure S6. TEM images of hydroquinone-reduced GNRs with (a) 0.00033 mM and (b) 0.0017 mM  $\text{NaBH}_4$ . Other additive concentrations:  $[\text{CTAB}] = 0.1 \text{ M}$ ,  $[\text{HAuCl}_4] = 0.40 \text{ mM}$ ,  $[\text{hydroquinone}] = 5.26 \text{ mM}$ ,  $[\text{AgNO}_3] = 0.21 \text{ mM}$ , in a total volume of 7.6 mL.

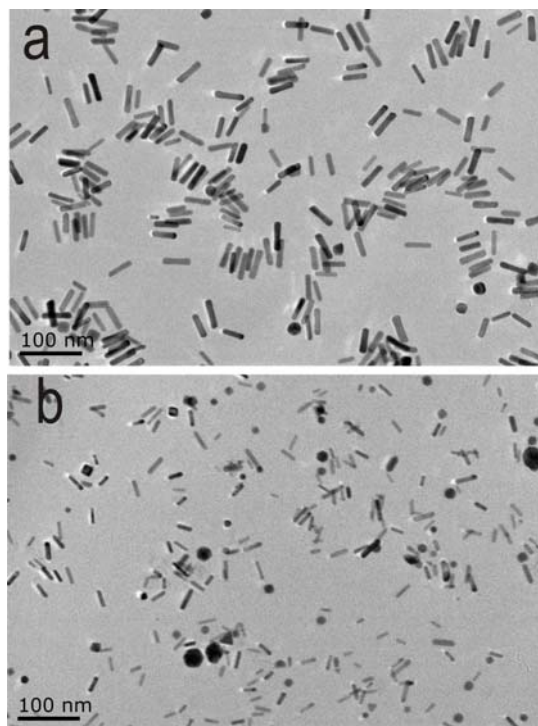

Figure S7. TEM images of 1,2,4-trihydroxybenzene-reduced GNRs at (a) 0.00066 and (b) 0.0040 mM  $\text{NaBH}_4$ . Concentrations of other additives:  $[\text{CTAB}] = 0.1 \text{ M}$ ,  $[\text{HAuCl}_4] = 0.40 \text{ mM}$ ,  $[1,2,4\text{-trihydroxybenzene}] = 0.80 \text{ mM}$ , and  $[\text{AgNO}_3] = 0.11 \text{ mM}$  in a total volume of 7.6 mL.

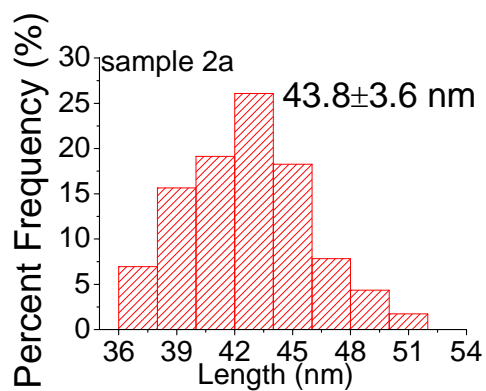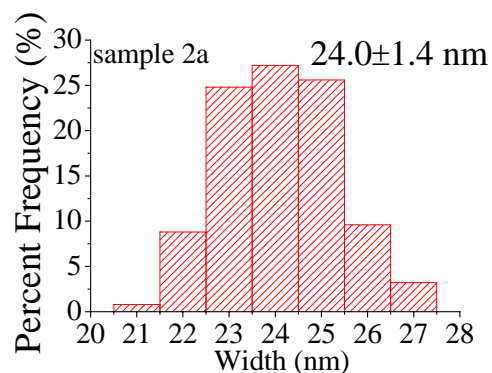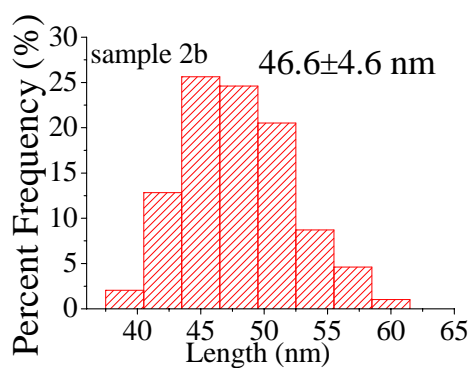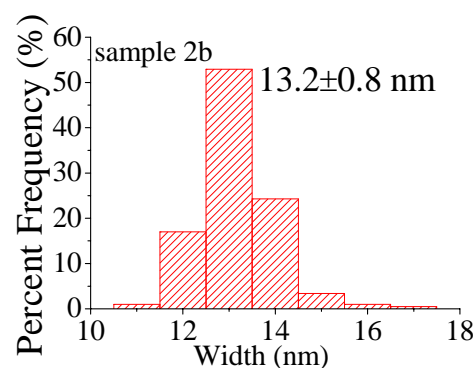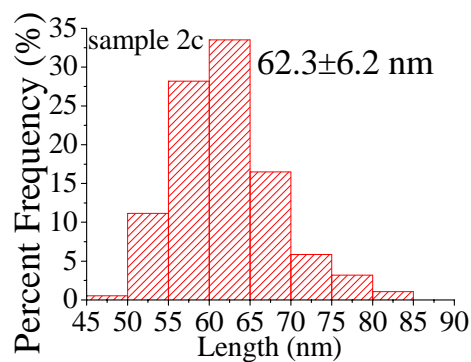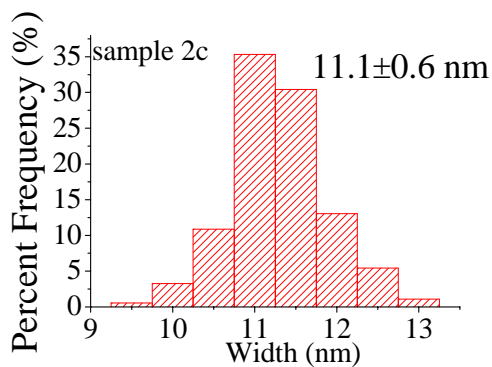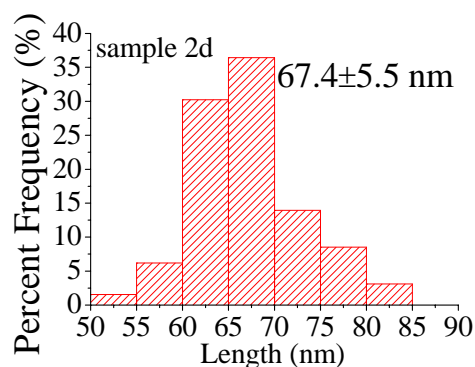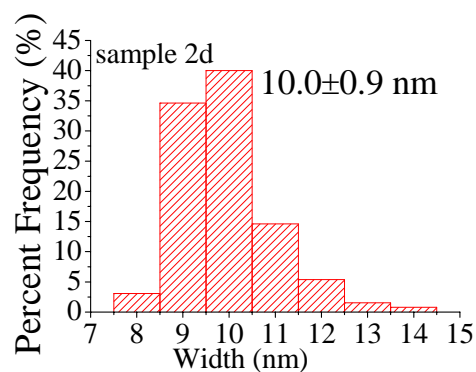

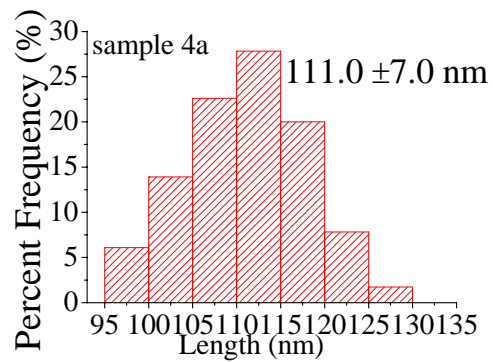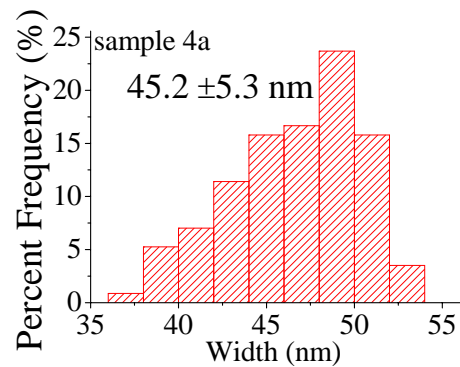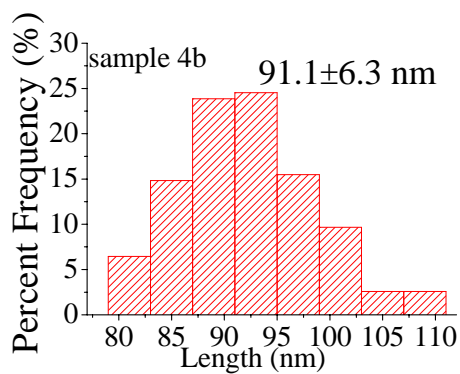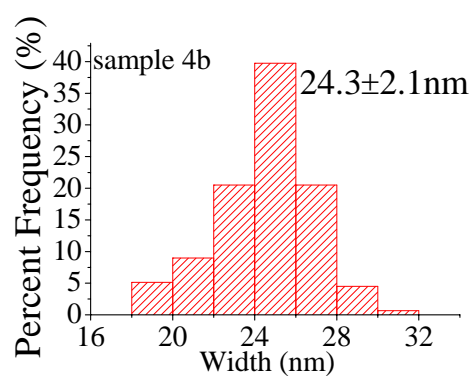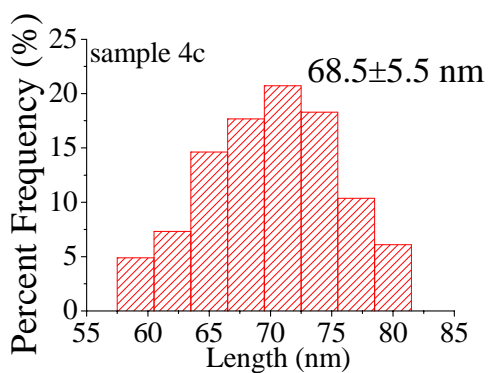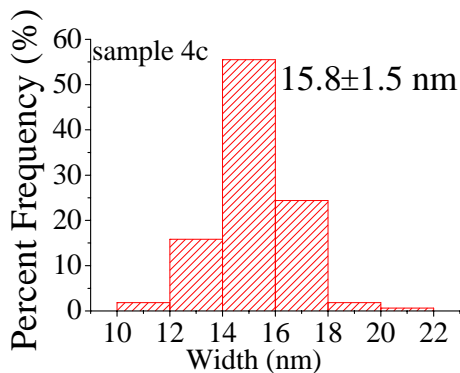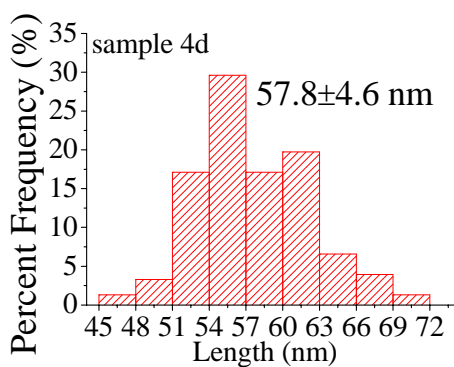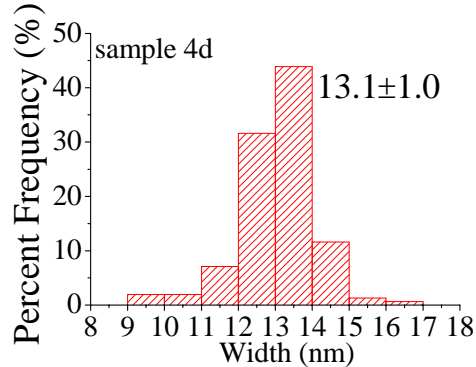

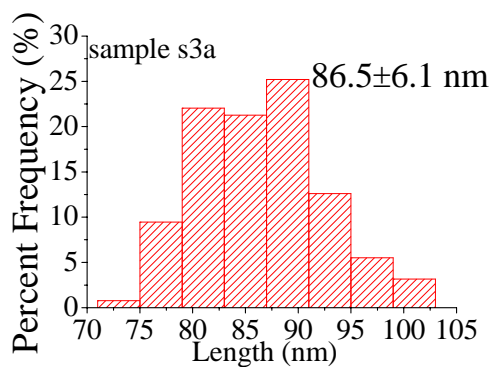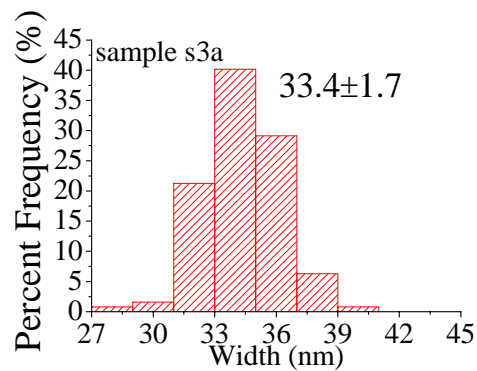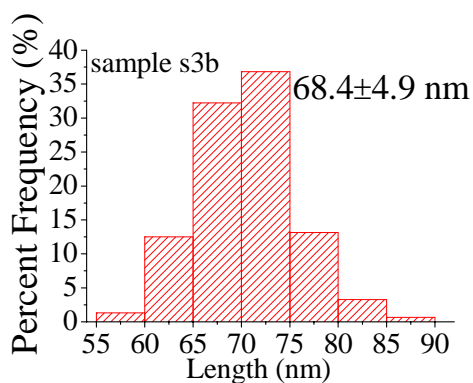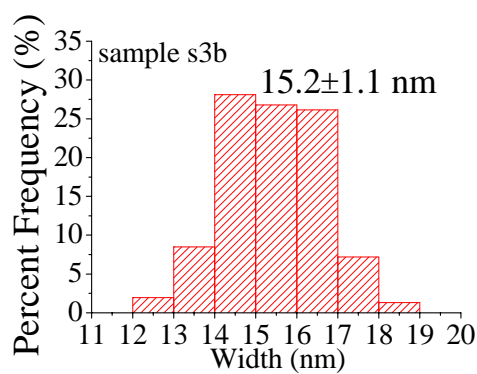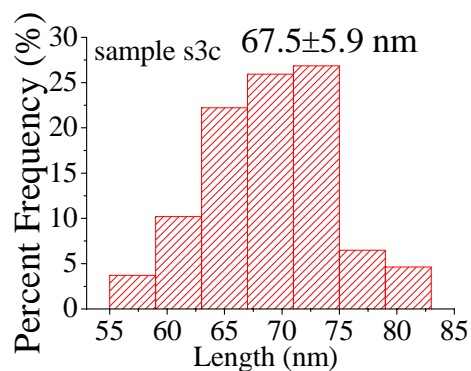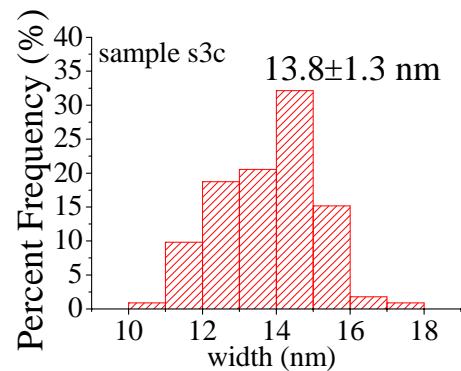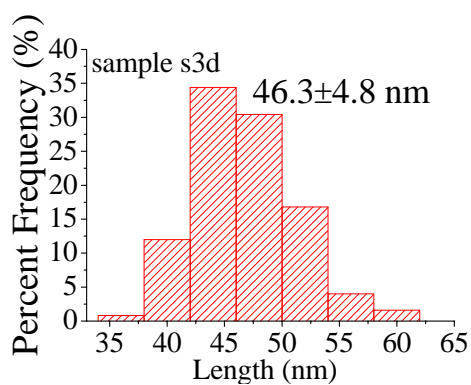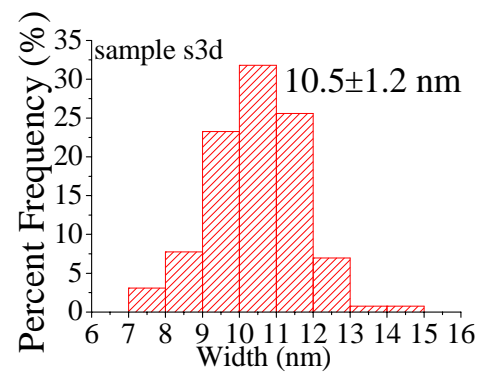

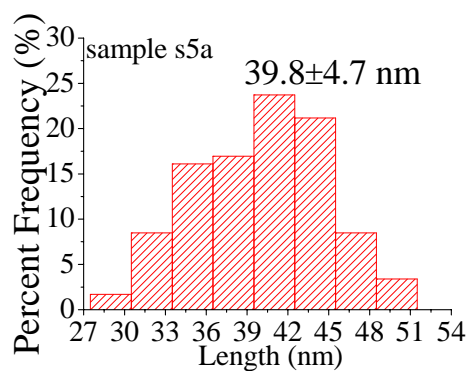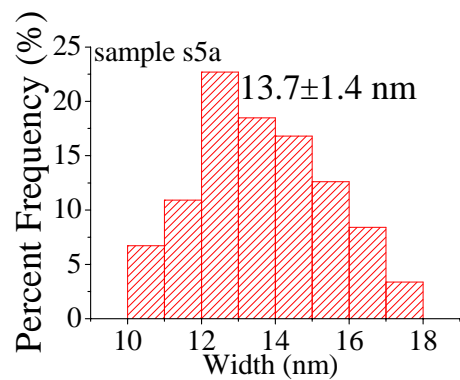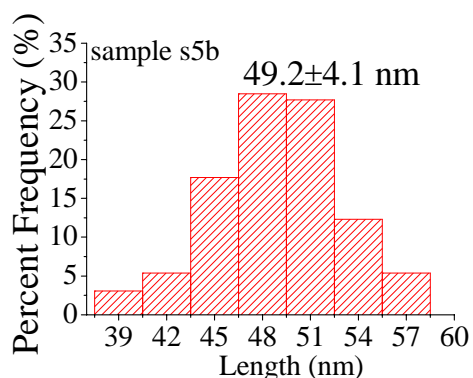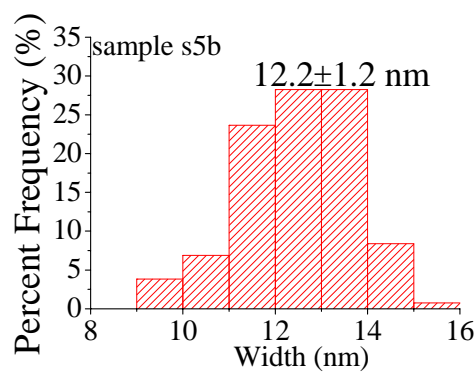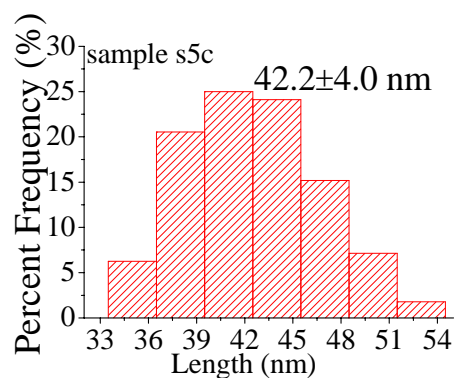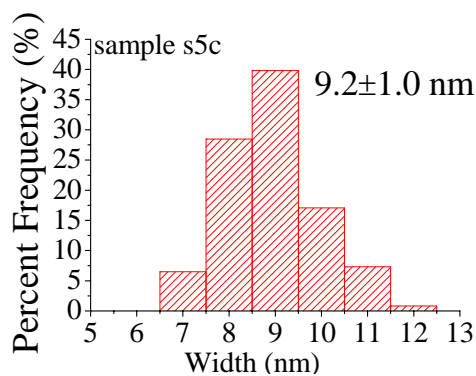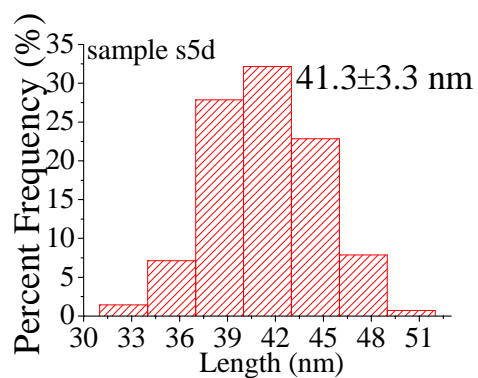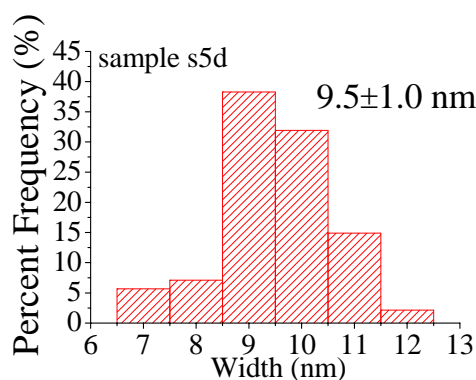

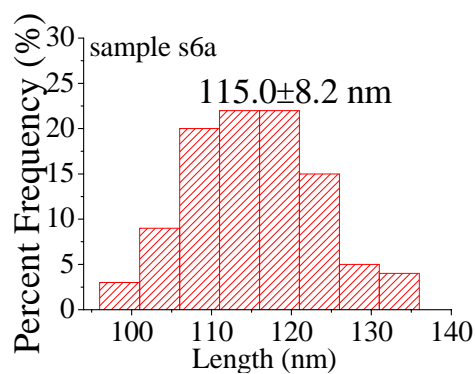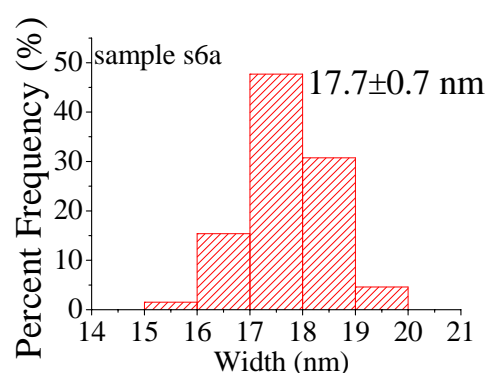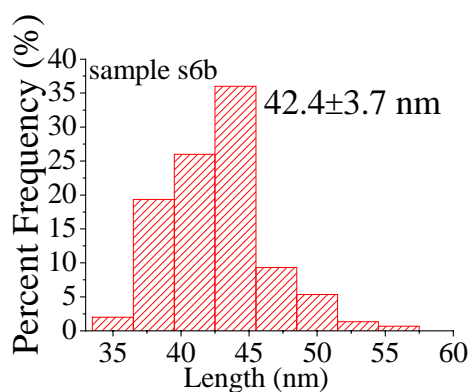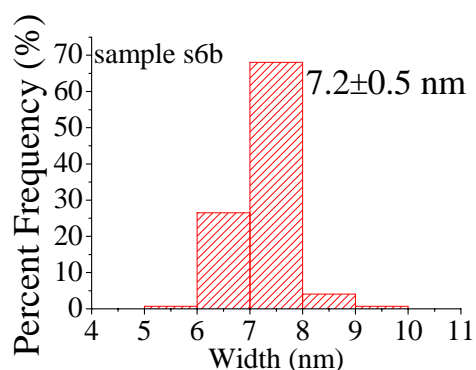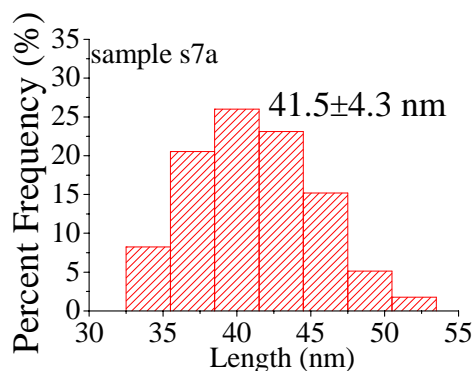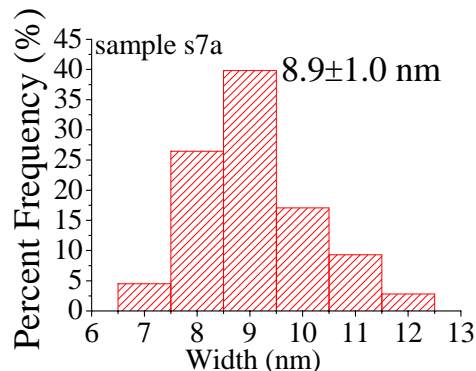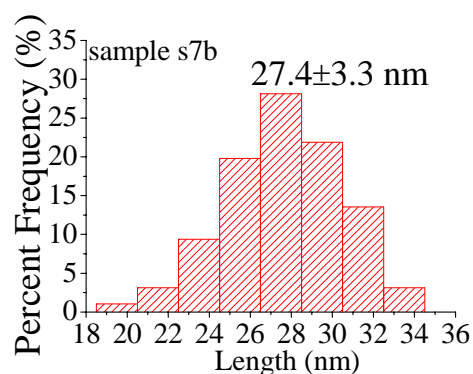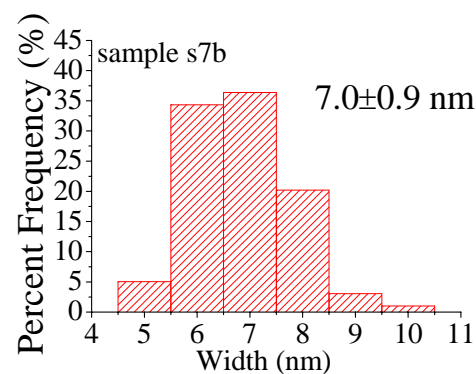

(a)

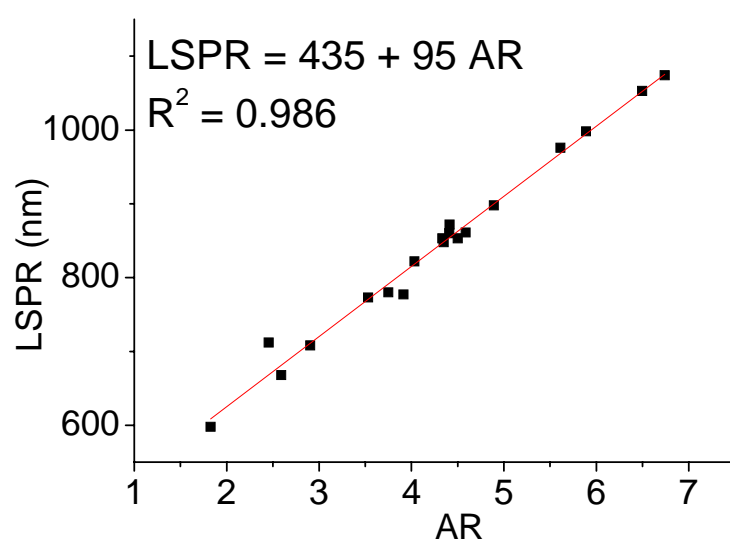

(b)

Figure S8. (a) Statistical analysis of the lengths and widths of GNRs; (b) a fitting curve using LSPR as a function of AR.



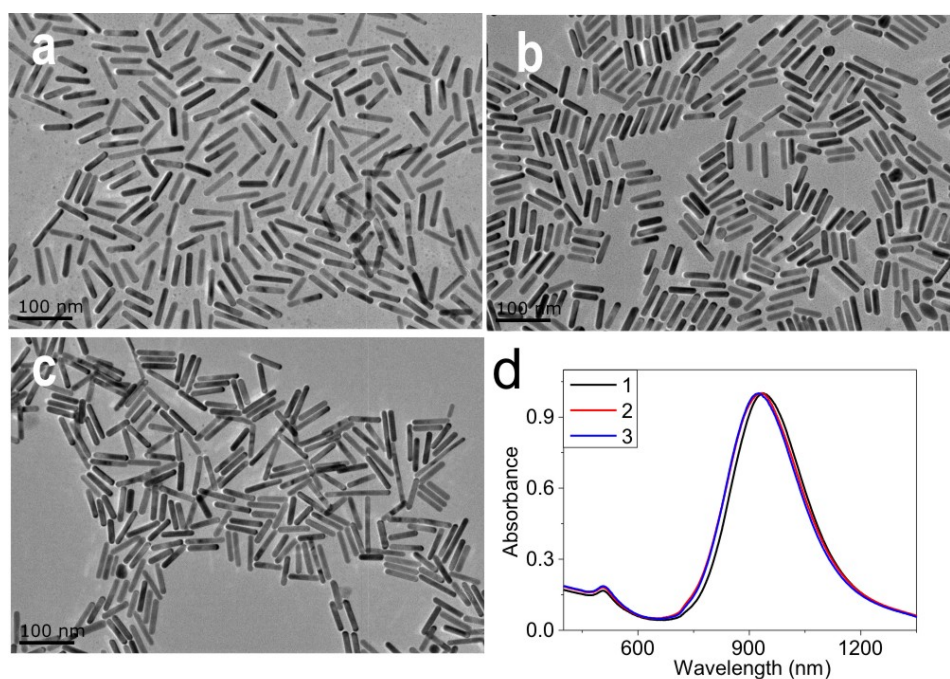

Figure S9. TEM images of GNRs initiated by three different batches of freshly prepared  $\text{NaBH}_4$  solutions (a-c) and (d) corresponding LSPR spectra.

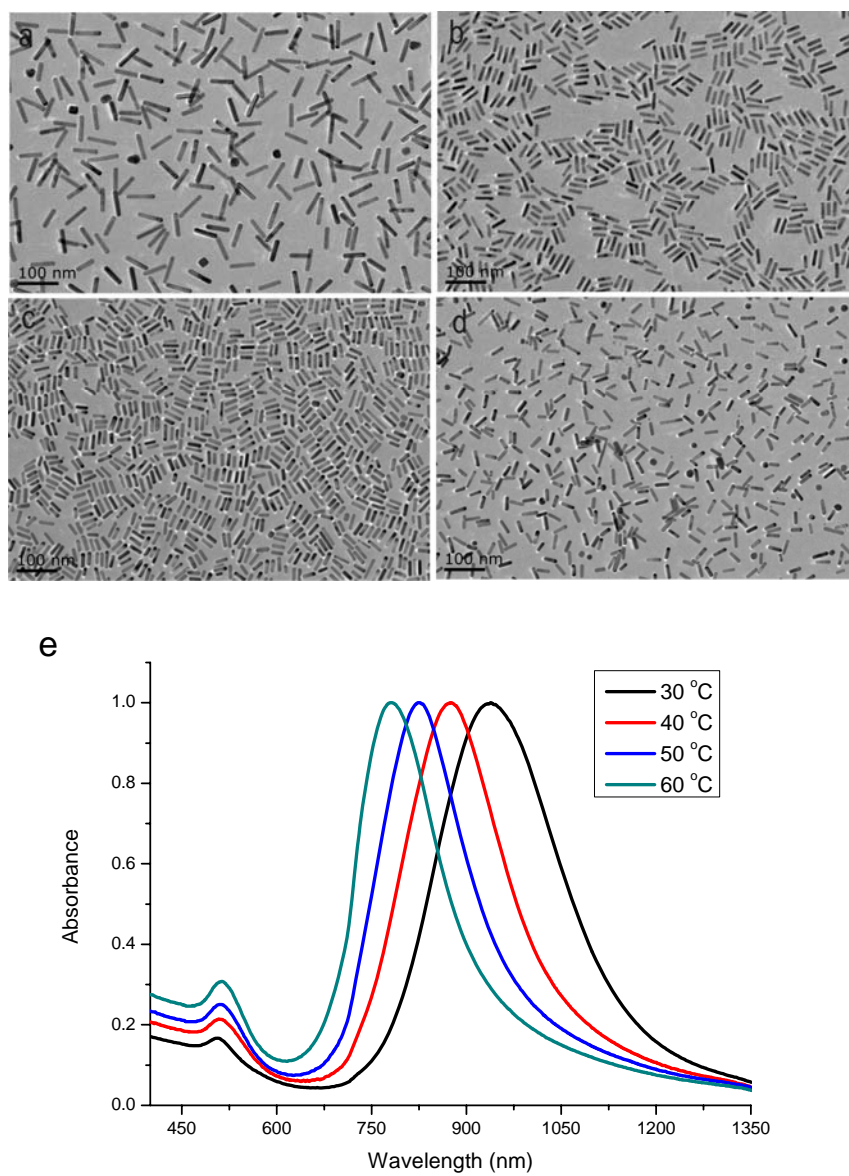

Figure S10. TEM images of GNRs produced only with different temperatures: (a) 30, (b) 40, (c) 50 and (d) 60 °C; (e) corresponding LSPR peaks of GNRs.

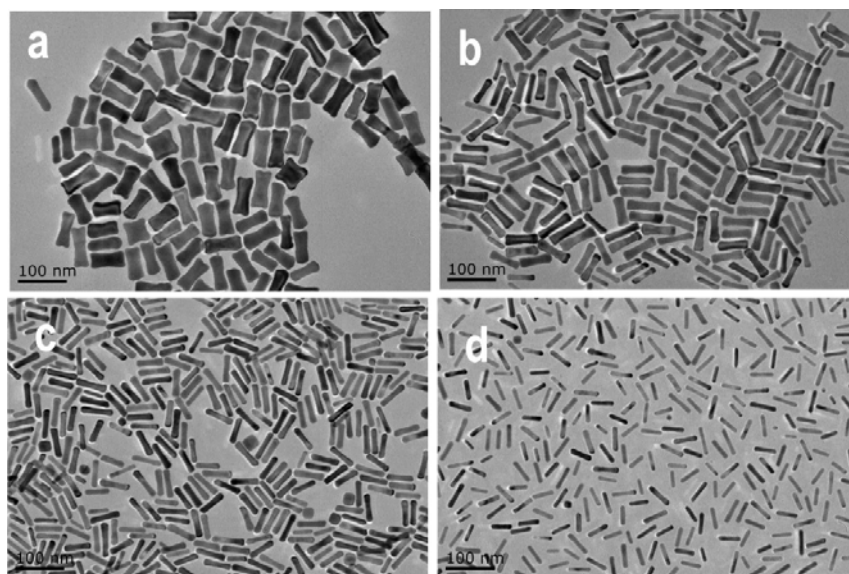

Figure S11 TEM images of 1,2,4-trihydroxybenzene-reduced GNRs with different seeds (seeds increase gradually from panels a to d)
